# Supplementary material for: Whole exome sequencing reveals novel somatic alterations in neuroblastoma patients with chemotherapy
Source: Cancer Cell Int. 2018 Feb 17;18:21. doi: 10.1186/s12935-018-0521-3 (PMC5816515; doi:10.1186/s12935-018-0521-3)
Supplement: Supplementary file 1 — Additional file 1. Original data of 27 NB patients of clinical features and NGS results. [file 12935_2018_521_MOESM1_ESM.xlsx]

## Sheet: Sheet4
No.	patient ID	gender	age（m）	diagnose date	LDH（U/L）	NSE（ng/ml）	stage	risk stratification	site of primary tumor	B-echo(before treatment)	CT(before treatment)	VMA（umol/cr）	HVA（umol/cr）	bone marrow involvment	LN metastasis	organ metastasis	CNS metastasis	orbital metastasis	other metastasis	BM involvment	MYCN	response evaluation(after 2nd chemo)	volume	date of 4th chemo	response evaluation(after 4th chemo,B-echo)	response evaluation(after 4th chemo,CT)	LDH（U/L）	NSE（ng/ml）	response evaluation(after 4th chemo)	follow up time(m)	time to progression(m)	current status	c.*231A>G (exon28)	c.*1592C>A (exon28)	c.*983C>A (exon28)	c.5691C>G (exon14)	c.6311C>A (exon19)	c.247G>C (exon1)	c.796G>A (exon6)	c.2428T>C (exon17)	c.2065T>C (exon17)	c.2793G>C (exon18)	c.1377C>T (exon15)	c.3918T>C (exon22)	c.1269+7T>C(IVS6)	c.*5G>A (exon3)	c.365A>C (exon2)	c.*20C>T (exon8)	c.1507G>T (exon5)
1	724685	2	39	2016-01-07	1685	＞370	IV	HR	1	16.6*8.8*21.7	14.9*9.2*17.7	1265.3	121.4	1	1	1	1	0	1	1	0	9.6×5.7×12cm	234.5cm3		9.7×6.1×11.6cm	184cm3	2	42.7	2	11		0	0.45
2	692106	2	28	2015-03-20	459	>370	Ⅳ	HR	1	8.4×8×10.4cm	331.9cm3，8.5*8.4*8.2	99.7	31.8	1	0	1	0	0	0	1	1	6.4×6.4×8.1cm	5.8cm*5.8cm	2015-06-05	4.8×4.7×5.5cm	4.9cm*4.5cm	1	40.5	2	16	16	1		0.32						0								0.81
3	680839	1	30	2014-12-24	2178	367.4	Ⅳ	HR	1	3.5×2.6×2.6cm	3.7cm*2.3cm*2.3cm	0.91	0.98	1	1	0	0	1	1	1	1	1.0×1.0×1.6	1.0×1.0×1.3	2015-03-18	1.0×0.6×1.3cm	0.297cm3	2	8.2	1	12	8	1
4	708175	2	24	2015-08-18	2227	＞370	Ⅳ	HR	1	4.9×6.5×9.0cm	87.1cm3	11.3	15.4	1	0	0	0	0	0	1	1	4.1×3.8×3.7cm	25.668cm3	2015-10-23	3.0×2.2×3.2cm	7.552cm3	1	12.8	1	16		0			0.46				0.24
5	716158	1	84	2015-10-27	317	70.3	Ⅳ	HR	1	2.0*0.6*1.1		22.6	19.1	1	1	0	0	0	1	1	1	1.7*1.4*1.4	19.6		2.1*2.1*1.5				2	14		0			0.33													0.49
6	706182	2	38	2015-07-30	671	353.9	Ⅳ	HR	1	8.3×6.1×11.4cm	277.696cm3	515.7	158.7	1	1	0	0	0	0	1	1	7.3×4.3×8.4cm	136.327cm3	2015-10-09	7.2×3.5×8.0cm	110.46cm3	1	15.3	2	17		0
7	720925	2	61	2015-11-20	371	341.8	IV	HR	1	10.7×9.1×19.5cm	406.998cm3	337.4	23.7	1	1	0	0	0	0	1	0	9.8*4.6*10.5	242.45		8*4.1*8.6	147.928			2	13		0													0.48
8	710286	1	36	2015-09-02	609	267.5	IV	HR	2	6.5×4.2×4.9cm	4.0*3.1*4.8cm	229.2	18.4	1	1	0	0	1	1	1	1	3.6×2.9×2.7cm	24.025cm3	2015-11-07	3.4×2.7×3.1cm	3.7*2.5*4.5	1	37.2	2	15		0							0									0.46
9	710251	2	39	2015-09-01	298	100.4	Ⅳ	HR	1	1.8×1.5×2.1cm	2.1*1.3*1.4	314.1	28	1	0	0	1	0	0	1	1		1.579cm3	2015-10-21	2.3*2.0*1.3		2	17.9	4	15		0
10	701296	2	19	2015-06-26	3512	＞370	Ⅳ	HR	1	10.7×16×19cm	977.29cm3	7.7	17.7	0	0	1	0	0	0	0	0	8.1*4.5*8.5/4.7*2.4*2.7	114.795	2015-09-08	4.2×1.4×6.2cm；5.5×4.7×6.1cm	72.29cm3	1	23.5	1	18		0																	0.47
11	689772	1	78	2015-02-28	973	197.2	Ⅳ	HR	1	2.9×3.7×8.1cm	11.5cm3	76.63		1	1	0	0	0	0	1	0	1.4×2.3×3.7cm	3.5cm3	2015-04-30	1.7×0.7×1.1cm		1	11.6	1	22		0				0.68
12	707596	1	30	2015-08-12	1081	＞370	Ⅳ	HR	1	10.2x8.0x11.7cm	10cm*6cm*12cm			0	1	0	0	0	0	1	1	8.5×6.1×9.8cm	68.7cm3	2015-10-21	5.2×4.0×8.4cm	46.128cm3	1	17.5	2	14	12	1					0.52				0
13	737879	2	40	2016-02-16	371	213.3	IV	HR	1	12.7×7.9×14.6cm	313.309cm3	204.4	17.2	0	1	0	0	0	0	1	0	12×6.0×14.5cm	159.423cm3		7.5×5.3×9.4cm	136.0cm3	1	38.8	2	10		0						0.39
14	704627	2	19	2015-07-10	3687	＞370	Ⅳ	HR	1	12.9×8.3×12cm	10.4*11.4*9.5cm	39.4	23.7	0	1	0	0	0	0	1	0	6.7×5.2×9.3cm	134.59，6.1*7.6*5.0	2015-09-26	5.0×4.0×5.8cm	4.9*3.2*5.0	2	40.1	1	6	6	1							0										0.5
15	699623	2	59	2015-05-28	833	>370.0	Ⅳ	HR	1	8.6×6.1×11cm	10.9*9.2*6.7cm	457.5	28.2	1	1	1	0	0	0	1	0	5.2×2.8×5.7cm	29.8cm3	2015-08-13	1.4×2.5×1.2cm	19.575cm3	1		1	19		0
16	719081	1	49	2015-11-19	591	266.6	IV	HR	2	1.5*2.0*3.0	1.3*2.2cm	28.63		0	1	0	0	0	1	1	1	1.0×0.9×4.2cm	3.95cm3	2016-02-07	0.6*0.5*0.8		1	19.5	1	13	12	1
17	718852	1	39	2015-11-19	469	273.6	IV	HR	1	12.8×10.6×12.1cm	11.3*7.5*9.7	162.4	70.6	1	1	0	0	0	0	1	0		8.2*7.5*6.7		6.4*4.1*8.6	110.11			2	13		0							0		0
18	712784	1	48	2015-09-21	707	＞370	IV	HR	1	6.7×6.9×11.1cm	5.1*7.14*10.3cm,135.4cm3	247.1	32.2	1	1	0	0	0	0	0	1	8.6×4.3×5.7cm	95.805cm3	2015-11-28	4.7×3.4×7.5cm	89.842cm3	1	23.6	3	15		0
19	723932	2	23	2015-12-18	3176	＞370	IV	HR	1	9.5*8.8*8.1cm	7.4*9.2*7.9cm	104.2	9.8	1	1	1	0	0	0	1	1	7.2×6.4×11cm	189.5cm3	2016-02-24	12.2×5.8×15.5cm	99.96cm3	3		1	5	4	1							0
20	737917	2	54	2016-02-17	354	114.5	IV	HR	1	2.8*2.2*3.4cm	10.984cm3	201.6	18.2	1	0	0	0	0	0	1	0	3.2×2.6×2.7cm	8.901cm3				1	19.1	3	10		0	0.48
21	724567	2	69	2016-01-04	1976	＞370	IV	HR	1	10.8×15.8×20.5cm	1043.396cm3	3228.8	173.18	1	0	1	1	0	1	1	0	12.2×6.9×8.2cm	420.821cm3		9.2×6.0×8.4cm	212.48cm3	1	17.6	2	11		0
22	719436	2	41	2015-12-15	308	70.4	IV	HR	1	13.0×8.0×9.6cm	8.4*124.3*88.6mm	38	13.3	0	0	0	0	0	0	0	0	14.6*7.5*9.4			13.5*7.2*8.0	408.8			3	12		0										0.49	0.49	0.49
23	704496	1	101	2015-07-30	366	86.1	Ⅳ	HR	2	7.6×3.8×4.5cm	4.3X3.9X8.4cm	1030.9	31.1	1	0	0	0	0	0	1	0			2015-10-27			1	20.9	1	15		0
24	710518	1	61	2015-09-09	542	＞370	Ⅳ	HR	1	10.7*8.2*10.5cm		1139.3	72.9	1	0	1	1	1	1	1	1	6.9×5.8×6.6cm	103.281cm3	2015-11-17	4.1*5.3*3.3	45.25	1	19.3	1	17		0							0								0
25	706607	2	36	2015-08-03	705	＞370	Ⅳ	HR	1	9.3×4.7×13.5cm	675.4cm3	140.2	11.2	1	1	0	1	0	0	1	0	10.2×4.1×7.0cm	56mm3	2015-10-10	5.9×3.2×6.0cm	52cm3	1	21.8	2	16		0
26	702426	1	15	2015-06-24	2450	＞370	Ⅳ	HR	1	8.6×11.4×14cm	14.6*12.6*9.4，675.4			1	1	0	1	1	0	0	0	7.0×3.8×8.4cm	106.487cm3	2015-09-24	4.2*1.3*4.9		1	25.8	1	18		0
27	709091	1	31	2015-08-20	6287	＞370	Ⅳ	HR	1	6.7×8×8.5cm	5.8cm*5.3cm*6.7cm	268	46.6	1	1	0	0	1	1	1	1	6.2×4.3×4.9cm	64.0cm3	2015-11-12	2.8×1.9×4.4cm	13.2cm3	1	16.4	1	11	11	1
																																	检测不到空项
[truncated: 247 more columns]
